# Supplementary material for: Inclusive, exclusive and hierarchical atlas of NFATc1+/PDGFR-α+ cells in dental and periodontal mesenchyme
Source: eLife. 2024 Dec 20;13:RP100173. doi: 10.7554/eLife.100173 (PMC11661793; doi:10.7554/eLife.100173)
Supplement: Figure 5—figure supplement 1—source data 1. — The quantification was done on a z stack of images in Imaris using the automatic spot detection feature. [file elife-100173-fig5-figsupp1-data1.xlsx]

## Sheet: Cell number (pulse)
	pulp					PDL
Pdgfr-α+ cells	4539	4697	4054		Pdgfr-α+ cells	3639	4194	3396
Nfatc1+ cells	374	325	339		Nfatc1+ cells	492	524	410
Pdgfr-α+Nfatc1+ cells	156	80	104		Pdgfr-α+Nfatc1+ cells	63	77	100

## Sheet: Cell number (tracing)
	pulp					PDL
Pdgfr-α+ cells	5713	5291	5390		Pdgfr-α+ cells	4598	3815	4242
Nfatc1+ cells	689	885	676		Nfatc1+ cells	1043	901	1179
Pdgfr-α+Nfatc1+ cells	294	381	296		Pdgfr-α+Nfatc1+ cells	111	147	187
